# Supplementary material for: Assessment of the Bacterial Diversity of Aircraft Water: Identification of the Frequent Fliers
Source: PLoS One. 2017 Jan 23;12(1):e0170567. doi: 10.1371/journal.pone.0170567 (PMC5256958; doi:10.1371/journal.pone.0170567)
Supplement: S2 Table — (XLSX) [file pone.0170567.s002.xlsx]

## Sheet: API
Sample ID on Lab Report	ID System	Profile #	Lab Report	ID Quality	Class	Long/Short Haul/Water Source/ WSV	Fwd/Aft
198-22-1-220610	API 20NE	4577745	Aeromonas hydrophilia/caviae 94.4%	Good	Gammaproteobacteria	Short	Fwd
197-37-1-210610	API 20NE	5574555	Aeromonas hydrophilia/caviae 98.7%	Good	Gammaproteobacteria	Short	Fwd
019-22-1-180111	API 20NE	1000204	Aeromonas salmonicida masoucida/achromogenes 60.9% Pasteurella spp. 29.3%	Low Discrimination	Gammaproteobacteria	Short	Fwd
331-37-1-130910	API 20NE	1040404	Aeromonas salmonicida/masoucida/achro mogenes 44.4% Pasteurella spp 32.8% Comamonas testosteroni/Pseudomonas alcaligenes 17.5%.	Low Discrimination	Gammaproteobacteria	Short	Fwd
198-37-1-210610	API 20NE	000055	Alcaligenes faecalis 50%, Comamonas testeroni/Pseudomonas alcaligenes 18%, Cupriavidus pauculus 18%, Brevundimonas diminuta/Oligella urethralis 12.5%	Low Discrimination	Betaproteobacteria	Water Source
291-22-1-121009	API 20NE	0400004	Brevundimonas vesicularis 93.7%	Good	Alphaproteobacteria	Short	Aft
139-37-1-310510	API 20NE	0450204	Brevundimonas vesicularis 75.1%, Chryseobacterium indologenes 24.4%	Low Discrimination	Alphaproteobacteria	Short	Fwd
376-37-1-261010	API 20NE	0400205	Brevundimonas vesicularis 76.6%, Chrysobacterium indologenes 19.6%, Sphingomonas paucimobilis 3%	Doubtful Profile	Alphaproteobacteria	Long	Aft
038-37-2-250111	API 20NE	0400004	Brevundimonas vesicularis 93.7%	Good	Alphaproteobacteria	WSV
354-37-2-270910	API 20NE	0460224	Brevundimonas vesicularis 95.1%	Good	Alphaproteobacteria	Short	Aft
077-37-2-120410	API 20NE	0060244	Brevundimonas vesicularis 95.2%, Sphingomonas paucimobilis 4.5%	Low Discrimination	Alphaproteobacteria	Long	Fwd
394-37-2-161110	API 20NE	0450344	Brevundimonas vesicularis 95.5 %	Good	Alphaproteobacteria	Short	Fwd
340-37-2-141209	API 20NE	0450344	Brevundimonas vesicularis 95.5%	Good	Alphaproteobacteria	Short	Aft
057-37-2-120310	API 20NE	0450344	Brevundimonas vesicularis 95.5%	Good	Alphaproteobacteria	Short	Fwd
376-22-1-261010	API 20NE	0440344	Brevundimonas vesicularis 96.6%, Sphingomonas paucimobilis 3.3%	Low Discrimination	Alphaproteobacteria	Short	Aft
377-22-1-261010	API 20NE	1440204	Brevundimonas vesicularis 97.8%	Good	Alphaproteobacteria	Short	Fwd
190-37-1-030709	API 20NE	0440244	Brevundimonas vesicularis 99.7%	Very Good	Alphaproteobacteria	Long	Fwd
022-22-2-190111	API 20NE	1440244	Brevundimonas vesicularis 99.7%	Very Good	Alphaproteobacteria	WSV
389-37-3-111110	API 20NE	0420204	Brevundimonas vesicularis 99.7%	Very Good	Alphaproteobacteria	Short	Fwd
165-22-2-070610	API 20NE	1156575	Burkholderia pseudomallei 92.6%, Pseudomonas aeruginosa 5.2% Pseudomonas fluorescens 2.0%	Low Discrimination	Betaproteobacteria	WSV
039-22-2-230210	API 20NE	2430004	Chryseobacterium indologenes 83.4%, Chryseobacterium meningosepticum 14.4%	Low Discrimination	Flavobacteriia	Long	Fwd
039-37-1-220210	API 20NE	2410004	Chryseobacterium indologenes 95.2%	Good	Betaproteobacteria	Short	Aft
189-22-1-030709	API 20NE	3471204	Chryseobacterium indologenes 99.9%	Very Good	Flavobacteriia	Short	Fwd
175-37-1-140710	API 20NE	1000444	Comamonas testosteroni /Pseudomonas alcaligenes 86.5%	Acceptable	Betaproteobacteria	Short	Fwd
172-37-1-140610	API 20NE	1000444	Comamonas testosteroni /Pseudomonas alcaligenes 86.5%	Acceptable	Betaproteobacteria	Long	Aft
078-37-1-120410	API 20NE	1000444	Comamonas testosteroni/ Pseudomonas alcaligenes 86.5%	Acceptable	Betaproteobacteria	Short	Fwd
268-37-1-020909	API 20NE	0004444	Comamonas testosteroni/Pseudomonas alcaligenes 73.3%, Delftia acidovorans 23.6%	Low Discrimination	Betaproteobacteria	WSV
037-37-1-220210	API 20NE	0000064	Comamonas testosteroni/Pseudomonas alcaligenes 48.1%, Brevundimonas diminuta/Oligella urethralis 32.8% , Methylobacterium mesophilicum 14.6%	Low Discrimination	Betaproteobacteria	Short	Fwd
257-22-1-210809	API 20NE	1040444	Comamonas testosteroni/Pseudomonas alcaligenes 65.7%, Pseudomonas stutzeri 19.9%	Low Discrimination	Betaproteobacteria	Short	Fwd
255-22-1-210809	API 20NE	1040444	Comamonas testosteroni/Pseudomonas alcaligenes 65.7%, Pseudomonas stutzeri 19.9%	Low Discrimination	Betaproteobacteria	Short	Fwd
030-37-1-150210	API 20NE	1040444	Comamonas testosteroni/Pseudomonas alcaligenes 65.9% , Pseudomonas stutzeri 19.8%	Low Discrimination	Betaproteobacteria	Short	Fwd
082-37-1-150410	API 20NE	1040444	Comamonas testosteroni/Pseudomonas alcaligenes 65.9% , Pseudomonas stutzeri 19.8%	Low Discrimination	Betaproteobacteria	Long	Aft
084-37-1-190410	API 20NE	1040444	Comamonas testosteroni/Pseudomonas alcaligenes 65.9% , Pseudomonas stutzeri 19.8%	Low Discrimination	Betaproteobacteria	Long	Fwd
010-37-1-180110	API 20NE	1040444	Comamonas testosteroni/Pseudomonas alcaligenes 65.9%, Pseudomonas stutzeri 19.8%	Low Discrimination	Betaproteobacteria	Long	Fwd
012-37-1-180110	API 20NE	1040444	Comamonas testosteroni/Pseudomonas alcaligenes 65.9%, Pseudomonas stutzeri 19.8%	Low Discrimination	Betaproteobacteria	Short	Fwd
077-37-1-120410	API 20NE	1040444	Comamonas testosteroni/Pseudomonas alcaligenes 65.9%, Pseudomonas stutzeri 19.8%	Low Discrimination	Betaproteobacteria	Water Source
176-37-2-140610	API 20NE	1040444	Comamonas testosteroni/Pseudomonas alcaligenes 65.9%, Pseudomonas stutzeri 19.8%	Low Discrimination	Betaproteobacteria	Long	Fwd
132-37-1-240510~1	API 20NE	1040444	Comamonas testosteroni/Pseudomonas alcaligenes 65.9%. Pseudomonas stutzeri 19.8%	Low Discrimination	Betaproteobacteria	Short	Fwd
174-37-1-210610	API 20NE	0000424	Comamonas testosteroni/Pseudomonas alcaligenes 81.1%	Acceptable	Betaproteobacteria	Long	Fwd
194-37-1-030709	API 20NE	1000444	Comamonas testosteroni/Pseudomonas alcaligenes 86.5%	Acceptable	Betaproteobacteria	Short	Aft
281-37-2-210909	API 20NE	1000444	Comamonas testosteroni/Pseudomonas alcaligenes 86.5%	Acceptable	Betaproteobacteria	Short	Fwd
140-37-2-310510	API 20NE	1000444	Comamonas testosteroni/Pseudomonas alcaligenes 86.5%	Acceptable	Betaproteobacteria	Long	Aft
382-22-1-021110	API 20NE	1010444	Comamonas testosteroni/Pseudomonas alcaligenes 88.3%	Acceptable	Betaproteobacteria	Short	Aft
169-37-1-210610	API 20NE	1001054	Comamonas testosteroni/Pseudomonas alcaligenes 94%	Good	Betaproteobacteria	Long	Fwd
127-37-1-240510	API 20NE	1000055	Comamonas testosteroni/Pseudomonas alcaligenes 95.7%	Good	Betaproteobacteria	Short	Aft
164-37-1-070610	API 20NE	1000055	Comamonas testosteroni/Pseudomonas alcaligenes 95.7%	Good	Betaproteobacteria	Short	Fwd
391-37-1-161110	API 20NE	1020004	Mannheimia haemolytica/Bibersteinia trehalosi 92.9%	Good	Gammaproteobacteria	Short	Aft
112-37-1-240510	API 20NE	0000004	Moraxella sp. 82.3%	Acceptable	Gammaproteobacteria	Long	Fwd
297-37-1-121009	API 20NE	0000004	Moraxella sp. 82.3%	Acceptable	Gammaproteobacteria	Short	Fwd
140-37-3-310510	API 20NE	0000004	Moraxella sp. 82.3%	Good	Gammaproteobacteria	Short	Fwd
332-37-1-130910	API 20NE	0000004	Moraxella sp. 82.3%	Acceptable	Gammaproteobacteria	Long	Aft
328-37-1-130910	API 20NE	0000004	Moraxella sp. 82.3%	Acceptable	Gammaproteobacteria	Short	Fwd
343-22-1-200910	API 20NE	0000004	Moraxella sp. 82.3%	Acceptable	Gammaproteobacteria	Long	Fwd
353-37-1-270910	API 20NE	0000004	Moraxella sp. 82.3%	Acceptable	Gammaproteobacteria	WSV
381-37-1-021110	API 20NE	0000004	Moraxella sp. 82.3%	Acceptable	Gammaproteobacteria	Short	Fwd
393-37-1-161110	API 20NE	0000004	Moraxella sp. 82.3%	Acceptable	Gammaproteobacteria	Long	Fwd
037-22-1-260111	API 20NE	0000004	Moraxella sp. 82.3%	Acceptable	Gammaproteobacteria	Short	Fwd
200-37-1-210610	API 20NE	0047764	Ochrobactrum anthropi 92.8%, Sphingomonas paucimobilis 6.7%	Low Discrimination	Alphaproteobacteria	Short	Aft
063-37-1-050309	API 20NE	1047444	Ochrobactrum anthropi 93.7%	Good	Alphaproteobacteria	Short	Aft
255-37-1-210809	API 20NE	1047444	Ochrobactrum anthropi 93.7%	Good	Alphaproteobacteria	WSV
014-37-1-160111	API 20NE	1047444	Ochrobactrum antropi 93.7%	Good	Alphaproteobacteria	Water Source
016-22-1-180111	API 20NE	1047444	Ochrobactrum antropi 93.7%	Good	Alphaproteobacteria	WSV
108-37-1-100510	API 20NE	1000004	Pasteurella spp 47.9%, Moraxella spp 25.6%, Mannheimia haemolytica/Pasteurella trehalosi 12.1%	Low Discrimination	Gammaproteobacteria	Long	Aft
302-22-2-041109	API 20NE	1000044	Pasteurella spp. 49.2%, Comamonas testosteroni/Pseudomonas alcaligenes 32.0%, Methylobacterium mesophilicum 10.1%, Brevundimonas diminuta/Oligella urethralis 4.5%	Low Discrimination	Gammaproteobacteria	Short	Aft
025-22-1-270110	API 20NE	1150475	Pseudomonas aeruginosa 99.6%	Very Good	Gammaproteobacteria	Short	Fwd
024-22-2-270110	API 20NE	0147575	Pseudomonas fluorescens 99.9%	Excellent	Gammaproteobacteria	Short	Aft
024-22-1-270110	API 20NE	0147575	Pseudomonas fluorescens 99.9%	Excellent	Gammaproteobacteria	Short	Aft
368-22-1-191010	API 20NE	0157575	Pseudomonas fluorescens 99.9%	Excellent	Gammaproteobacteria	Long	Aft
421-22-1-231210	API 20NE	0157575	Pseudomonas fluorescens 99.9%	Excellent	Gammaproteobacteria	Water Source
382-22-2-021110	API 20NE	5477761	Pseudomonas luteola 90.8%, Aeromonas hydrophila/Aeromonas caviae 7.2%, Burkholderia cepacia 1.8%	Low Discrimination	Gammaproteobacteria	Long	Fwd
025-37-1-210111	API 20NE	0463304	Sphingobacterium multivorum 60.3% Sphingomonas paucimobilis 28.2% Sphingobacterium spiritivorum 11.4%	Low Discrimination	Sphingobacteriia	Long	Fwd
354-37-1-270910	API 20NE	0461004	Sphingomonas paucimobilis 49.9%, Brevundimonas vesicularis 49.4%	Low Discrimination	Alphaproteobacteria	Long	Aft
116-22-2-230409	API 20NE	0441344	Sphingomonas paucimobilis 92.9%	Good	Alphaproteobacteria	Short	Fwd
013-37-1-180110	API 20NE	0461264	Sphingomonas paucimobilis 97.7%	Good	Alphaproteobacteria	Short	Aft
033-37-1-180210	API 20NE	0465304	Sphingomonas paucimobilis 97.9%	Good	Alphaproteobacteria	Long	Aft
080-37-1-120410	API 20NE	0062665	Sphingomonas paucimobilis 98.0%	Good	Alphaproteobacteria	Long	Aft
320-37-1-100910	API 20NE	0463345	Sphingomonas paucimobilis 99.9%	Excellent	Alphaproteobacteria	Long	Aft
038-37-1-250111	API 20NE	0010004	Weeksella virosa/Empedobacter brevis 80.1%	Acceptable	Flavobacteriia
